# Supplementary material for: Microbiome and lipidomic analysis reveal the interplay between skin bacteria and lipids in a cohort study
Source: Front Microbiol. 2024 Apr 11;15:1383656. doi: 10.3389/fmicb.2024.1383656 (PMC11043602; doi:10.3389/fmicb.2024.1383656)
Supplement: Supplementary file 3 [file Table_3.XLSX]

## Sheet: Supplementary table 3
cluster_rank	cluster_X	cluster_Y	best_adjusted_pvalue
1	PWY-7391;CRNFORCAT-PWY;METHGLYUT-PWY;PWY-6919;ORNDEG-PWY;PWY-6992;AEROBACTINSYN-PWY;PWY-7446;PWY0-41;PWY-4984;HEXITOLDEGSUPER-PWY;P461-PWY;PWY-6107;PWY-722;PWY-4361;PWY-7527;PWY-3801;PWY-5088;PWY-6728;PWY-6470;VALDEG-PWY;PWY-6339;P184-PWY;PWY-7098;PWY-6338;PWY-7097;ASPASN-PWY;DENITRIFICATION-PWY;PWY-5971;PWY0-1261;PWY-5838;PWY-5861;PWY0-1479;PWY-6628;PWY-6630;PWY-6467;NAGLIPASYN-PWY;PWY-1269;UBIS…	per.ADS;FFA;per.AP;per.AH;per.AS;per.NH;CHOL.S;per.NP;per.NS	6.60512e-10
2	PWY-7456	FFA;per.AP;per.AH;per.AS;per.NH;CHOL.S;per.NP;per.NS	7.98537e-06
3	P42-PWY;TRNA-CHARGING-PWY;DENOVOPURINE2-PWY;PWY-7187;ARGSYNBSUB-PWY;ARGSYN-PWY;PWY-7400;PWY-5918;PWY-6969;PWY-7184;PWY0-166	per.EOH;per.EOS	1.41311e-05
4	TCA;PWY-5188;PWY-5189	per.EOH;per.EOS	4.06558e-05
5	PWY-7254	per.EOH;per.EOS	4.27142e-05
6	PWY-1882;PWY-5529;PWY-7347;SUCSYN-PWY;PWY-6876;LIPASYN-PWY;PWY-6404;PWY-6948;PWY-6731;PWY-7198;PWY-7210;PWY-6210;PWY-6505;FUCCAT-PWY;PWY-5677;PWY-7090;THREOCAT-PWY;ECASYN-PWY;KDO-NAGLIPASYN-PWY;PWY-7332;P163-PWY;PWY-6588;PWY-7003;GLCMANNANAUT-PWY;P441-PWY;PWY-7013;FUC-RHAMCAT-PWY;GLYCOL-GLYOXDEG-PWY;CENTFERM-PWY;PWY-6590;PWY-7377;P381-PWY;PWY-5507;P162-PWY;PWY-5177;CODH-PWY;P164-PWY;PWY-6892;THIS…	per.EOH	7.20434e-05
7	PWY490-3;PWY0-1241;POLYAMINSYN3-PWY;ARG㳢_xD800_숍SYN;POLYAMSYN-PWY;PWY-5676;PWY-7376;PWY-5509;PWY-6269	per.EOS	8.92325e-05
8	PWY-6749	FFA;per.AP;per.AH;per.AS;per.NH;CHOL.S;per.NP;per.NS	0.000106802
9	METH-ACETATE-PWY	per.ADS;FFA;per.AP;per.AH;per.AS;per.NH;CHOL.S;per.NP;per.NS	0.000133446
10	METH-ACETATE-PWY	per.EOH	0.000203067
11	PWY-7220;PWY-7222	per.EOH;per.EOS	0.000214083
12	PWY-6383;GLYCOCAT-PWY;GLYCOGENSYNTH-PWY;PWY-6737;P562-PWY;PWY-7237;GLUCOSE1PMETAB-PWY;PWY-5384;GLUCUROCAT-PWY;PWY-7242;P108-PWY;PWY-5104	per.EOS	0.000232744
13	GLUTORN-PWY	per.EOS	0.000256775
14	RIBOSYN2-PWY;HEMESYN2-PWY;PWY-7539	per.EOH;per.EOS	0.000263188
15	HISTSYN-PWY	per.EOH;per.EOS	0.000276325
16	PWY-7221;PWY-6125;PWY-7228	per.EOH;per.EOS	0.000281429
17	PWY-7208	per.EOH;per.EOS	0.000281429
18	PWY-722;PWY-4361;PWY-7527	per.EOH	0.000295564
19	PWY-5686;PWY0-162;COA-PWY;PEPTIDOGLYCANSYN-PWY;PWY-6387;PWY-6126;PWY-7229;PWY-7234;PWY-6123;PWY-7219;PWY-7197;PWY-841	per.EOH;per.EOS	0.000295968
20	SER-GLYSYN-PWY;BRANCHED-CHAIN-AA-SYN-PWY;PWY-5103;PWY-5101;ILEUSYN-PWY;VALSYN-PWY	per.EOH;per.EOS	0.000302973
21	PWY-6151	per.EOH;per.EOS	0.000309308
22	PWY-6609;PWY-7199;HEME-BIOSYNTHESIS-II;PWY-7196;PWY-7200	per.EOH;per.EOS	0.00032672
23	PWY-6147;THRESYN-PWY	per.EOH;per.EOS	0.000329866
24	ANAGLYCOLYSIS-PWY	per.EOH;per.EOS	0.000383603
25	PWY-5667;PWY0-1319	per.EOH;per.EOS	0.000433518
26	POLYISOPRENSYN-PWY	per.EOH;per.EOS	0.000433529
27	PWY-5304	per.EOS	0.000503454
28	PWY-5659;PWY-6385;1CMET2-PWY;PENTOSE-P-PWY;DAPLYSINESYN-PWY;PWY-5097;NONMEVIPP-PWY;PWY-7560;PWY-5121;PWY-7392	per.EOS	0.000545094
29	NONOXIPENT-PWY;PWY-3001;COMPLETE-ARO-PWY;ARO-PWY;PWY-6163	per.EOH;per.EOS	0.000555452
30	PWY-6897	per.EOH;per.EOS	0.000559272
31	PWY-2942	per.EOH;per.EOS	0.000564936
32	UDPNAGSYN-PWY	per.EOH;per.EOS	0.000572618
33	FOLSYN-PWY;PWY-6612	per.EOH;per.EOS	0.000630484
34	PWY-6386	per.EOH;per.EOS	0.00063814
35	PWY-6121;PWY-6122;PWY-6277	per.EOH;per.EOS	0.000872743
36	PWY-6588;PWY-7003	per.EOS	0.000919138
37	HISDEG-PWY	per.EOS	0.000945023
38	GLUCONEO-PWY;PWY-5100;TRPSYN-PWY;PANTO-PWY;PANTOSYN-PWY;CALVIN-PWY;ANAEROFRUCAT-PWY;GLYCOLYSIS;PWY-5484;PHOSLIPSYN-PWY;PWY4FS-7;PWY4FS-8	per.EOS	0.00134178
39	CODH-PWY	per.EOS	0.00176504
40	PWY-621	per.EOH;per.EOS	0.00184211
41	REDCITCYC	per.EOS	0.00203406
42	PWY-7013;FUC-RHAMCAT-PWY;GLYCOL-GLYOXDEG-PWY;CENTFERM-PWY;PWY-6590;PWY-7377;P381-PWY;PWY-5507	per.EOS	0.00219891
43	PWY-7111	per.EOS	0.00226752
44	PWY-5840;PWY-5899;PWY-5897;PWY-5898	per.EOS	0.00250786
45	PWY-7456	per.EOH	0.00261413
46	PWY-6470;VALDEG-PWY	per.EOH	0.00328199
47	PWY-5198;CHLOROPHYLL-SYN;PWY-5531;PWY-7159;PWY-7315;ALL-CHORISMATE-PWY;PWY-5845;PWY-5862;PWY-5860;PWY-5850;PWY-5896	per.EOS	0.00371893
48	ARGORNPROST-PWY	per.EOS	0.00419017
49	PWY-5028;GALACT-GLUCUROCAT-PWY;GALACTUROCAT-PWY;PWY-5705;PWY0-1533	per.EOS	0.00419495
50	PWY-5695;PWY-3781;PYRIDNUCSAL-PWY;PYRIDNUCSYN-PWY	per.EOS	0.00463826
51	PWY-7046	per.AS;per.NH	0.00563329
52	NADSYN-PWY;PWY-5651;PWY-5647;PWY-5655;GALLATE-DEGRADATION-II-PWY;GALLATE-DEGRADATION-I-PWY;METHYLGALLATE-DEGRADATION-PWY	per.EOS	0.00587575
53	PWY-4361;PWY-7527	IL1a.pg.ml	0.00637608
54	PWY-722;PWY-4361;PWY-7527	per.EOS	0.00651108
55	METHGLYUT-PWY	per.EOH	0.0069875
56	PWY-7031;PWY-7373	FFA	0.00702375
57	P162-PWY;PWY-5177	per.EOS	0.00711298
58	PWY-7456	per.EOS	0.0071745
59	PWY-3801	per.EOH	0.00732595
60	PWY-6339;P184-PWY;PWY-7098;PWY-6338;PWY-7097	per.EOH	0.00752249
61	PWY-7046	per.EOS	0.00822521
62	DENOVOPURINE2-PWY;PWY-7187	CHOL.S;per.NP;per.NS	0.00921174
63	PWY0-1277;HCAMHPDEG-PWY;PWY-6690	Ceramide	0.00936116
64	PWY-5088	Ceramide	0.0101113
65	PWY-2941;PWY-6891	per.EOS	0.0108313
66	PWY-6507	per.EOS	0.011176
67	TRNA-CHARGING-PWY;DENOVOPURINE2-PWY;PWY-7187	FFA	0.0113856
68	PWY-6143	IL1a.pg.ml	0.0123593
69	GLUCOSE1PMETAB-PWY;PWY-5384	FFA	0.0131419
70	P164-PWY	per.EOS	0.0145866
71	GLCMANNANAUT-PWY	per.EOS	0.0150667
72	PWY-5022	per.AH	0.0158322
73	PWY-5183;PWY-6071;PWY0-321;PWY-5181;PWY-6185	per.EOS	0.0159344
74	P42-PWY	FFA	0.0160825
75	CODH-PWY	per.NDS	0.0161777
76	PWY-6174	FFA	0.0161783
77	PWY-6071	per.NDS	0.0162329
78	P621-PWY	per.EOS	0.0168369
79	ARGDEG-PWY;ORNARGDEG-PWY	per.EOS	0.017096
80	PWY0-41	per.EOH	0.0172498
81	PWY-6713	FFA	0.017393
82	P108-PWY	FFA	0.0179901
83	PWY-6396	per.EOS	0.0193232
84	PWY-5154	per.EOS	0.0204607
85	PWY-7046	per.NP	0.0207243
86	PWY-5178	per.NDS	0.0209503
87	PWY-6151	per.NP;per.NS	0.02162
88	PWY-6562	per.EOS	0.02162
89	PWY-5088	IL1a.pg.ml	0.0218425
90	GLUCARDEG-PWY;GALACTARDEG-PWY;GLUCARGALACTSUPER-PWY	per.EOS	0.0222584
91	PWY-6339;P184-PWY;PWY-7098;PWY-6338;PWY-7097	per.EOS	0.023282
92	ARGSYNBSUB-PWY;ARGSYN-PWY;PWY-7400;PWY-5918;PWY-6969;PWY-7184;PWY0-166	FFA	0.0255478
93	PWY-6182;PWY-5417;PWY-5431	Ceramide	0.0258741
94	HEXITOLDEGSUPER-PWY;P461-PWY	per.EOH	0.0264618
95	PWY-5304	CHOL.S	0.026551
96	PWY-6151	per.NH	0.0266427
97	PWY-7007	Ceramide	0.0280292
98	PWY-7431	per.EOS	0.0284825
99	PWY-5654	Ceramide	0.0288299
100	TRNA-CHARGING-PWY	per.NP	0.0288603
101	PWY-5505	Ceramide	0.030148
102	PWY0-1297	per.EOS	0.0305015
103	KDO-NAGLIPASYN-PWY	per.EOS	0.0315029
104	P241-PWY	FFA	0.0326219
105	PWY-621	FFA	0.0326571
106	P42-PWY	per.NP	0.033214
107	PWY-5837;PWY-5863	per.EOS	0.0345334
108	VALDEG-PWY	per.EOS	0.0347882
109	LIPASYN-PWY	per.EOS	0.0353293
110	GALACT-GLUCUROCAT-PWY;GALACTUROCAT-PWY	per.NDS	0.0353327
111	CATECHOL-ORTHO-CLEAVAGE-PWY	per.NDS	0.0355066
112	PWY-6470	IL1a.pg.ml	0.0355393
113	PWY-5028	Ceramide	0.0355557
114	PWY-1882	Ceramide	0.0356336
115	PWY-6151	FFA	0.0362693
116	PWY-7391	per.EOH	0.036564
117	METH-ACETATE-PWY	CHOL	0.036615
118	CRNFORCAT-PWY	per.EOS	0.0367061
119	PWY-7373	per.NH	0.0371034
120	PROTOCATECHUATE-ORTHO-CLEAVAGE-PWY	Ceramide	0.0373265
121	P221-PWY	per.NDS	0.0389599
122	PWY-621	per.NH	0.0390561
123	PWY-6470	per.NDS	0.0390561
124	PWY-5028	per.NDS	0.0395957
125	PWY0-321	per.NDS	0.0407213
126	PWY-7007	per.NDS	0.0408727
127	PWY-7187	per.NH	0.0409168
128	ARGSYNBSUB-PWY;ARGSYN-PWY;PWY-7400	per.NP	0.0419843
129	PWY-6210;PWY-6505	per.EOS	0.0423835
130	P162-PWY	per.NDS	0.0426957
131	PWY-5022	per.NS	0.0441032
132	PWY-5154	CHOL	0.0442078
133	NAD-BIOSYNTHESIS-II	per.EOS	0.0446306
134	PWY-6891	Ceramide	0.0453943
135	PYRIDOXSYN-PWY	per.EOS	0.0453943
136	HISDEG-PWY	FFA	0.0456406
137	PWY-5022	per.AS	0.0461523
138	GLUCUROCAT-PWY	FFA	0.0465238
139	PWY-4361;PWY-7527	per.NDS	0.046933
140	P125-PWY	per.EOS	0.0473698
141	P101-PWY	IL1a.pg.ml	0.0475877
142	SULFATE-CYS-PWY	per.EOS	0.0479304
143	PWY-4984	CHOL	0.0481553
144	PWY-621	per.NS	0.0492091
145	PWY-6969	per.NP	0.0495085
146	PWY-6749	Ceramide	0.0497138
147	PWY0-166	per.NP	0.0499616
